# Supplementary material for: Solving a Class of Cut-Generating Linear Programs via Machine Learning
Source: Atypon-hosted journal article supplement (doi:10.1287/ijoc.2022.0241), 2024-01-04
Supplement: ijoc.2022.0241.sm1.pdf [file ijoc.2022.0241.sm1.pdf]

## Online Supplement

# Solving a Class of Cut-Generating Linear Programs via Machine Learning

Atefeh Rajabalizadeh    Danial Davarnia

### Appendix A: Omitted Computational Results

In this section, we present the detailed reports for the classification results for the problems studied in Section 4. First, we provide the numerical results for the CHM problem. In particular, Tables 4–8 report the classification results for the random forest (RF), the  $k$ -nearest neighbor (KNN), logistic regression (LR), support vector machines (SVM), and neural network (NN), respectively. For each of the classification methods, the main algorithmic choices and parameter settings are reported in the caption of the corresponding tables. These parameter values are selected through tuning and cross validation. Once selected, these settings remain the same as “universal settings” across all problem instances and size categories.

In Tables 4–8, columns “Size” and “#” represent the size category and the test instance number, respectively. Column “data” distinguishes the results for the training and the test set for each instance. The entries of the *confusion matrix* as a result of the training are given in columns “TN”, “FP”, “FN” and “TP”. Column “Accuracy” reports the accuracy of the trained classifier calculated as  $\frac{TN+TP}{TN+TP+FP+FN}$ . The entry under columns “ML Time” and “CGLP Time” are defined similarly to those in Table 1 in Section 4.1.

Next, we present detailed reports for some instances of the binary programs studied in Section 4.2 that include the classification results for each layer of the B&B tree. Table 9 shows the results for the first instance, i.e., instance #1 of size  $n = 40$  and  $m = 50$ , of the multi-knapsack problems of Table 2. Similarly, Table 10 shows the results for the first instance, i.e., instance p0033, of the benchmark problems of Table 3. In these tables, each row contains the classification outcome for each layer of the B&B tree. The layer number (depth) is reported in the first column of these tables. At each layer, the LR classifier is trained based on the projection cone of the CGLP that is solved at the nodes of that layer. The training time is reported in the second column of Tables 9 and 10. Then, for each unpruned node in that layer, the classification is performed on the vector defined by the fixed partial assignment in that node used in the objective function of the CGLP; see Section 4.2 for a detailed account on the derivation procedure and algorithmic settings. The classification results are compared with the true values obtained from solving the CGLP at each node. Columns 3-6 in Tables 9 and 10 represent the elements of the confusion matrix for all the nodes in the layer. The accuracy of the classification approach for each layer is reported in the last column.

In view of the results of Tables 9 and 10, we observe that the overall accuracy often decreases as the B&B tree depth increases. Note that size of the the CGLP formed for each node of the B&B tree decreases as the depth of that node increases due to the fact that the number of unfixed variables used in Algorithm 1

to multiply with the constraints of the original problem decreases. This leads to a CGLP model with fewer variables and constraints. Therefore, as observed in the CHM results, the classification approach yields a lower accuracy for smaller problem sizes. Nevertheless, the reduction in accuracy is mostly attributed to the increase in the false negative misclassification, as a result of which a cut is not added to the model. This misclassification does not lead to excluding feasible solutions. Furthermore, the above-mentioned decrease in the size of the underlying CGLPs also leads to a smaller training time as the depth of the B&B tree increases. Lastly, we note that the total number of nodes reported in the confusion matrix entries in Tables 9 and 10 is smaller than the size of the B&B tree reported in Tables 2 and 3 since the LR method is only applied to the nodes that are not pruned by the solver after creation, which are still counted to calculate the total B&B tree size.

**Table 4** Classification results for the *Random Forest* with tree number  $k = 18$

| Size     | # | Data  | TN   | FP  | FN  | TP   | Accuracy | ML Time | CGLP Time |
|----------|---|-------|------|-----|-----|------|----------|---------|-----------|
| 100×300  | 1 | train | 800  | 0   | 3   | 797  | 0.99     | 0.36    | -         |
|          |   | test  | 200  | 50  | 51  | 199  | 0.79     | 1.99e-5 | 0.01      |
|          | 2 | train | 800  | 0   | 8   | 792  | 0.99     | 0.32    | -         |
|          |   | test  | 185  | 65  | 59  | 191  | 0.75     | 2.19e-5 | 0.01      |
|          | 3 | train | 800  | 0   | 5   | 795  | 0.99     | 0.33    | -         |
|          |   | test  | 231  | 19  | 45  | 205  | 0.87     | 1.39e-5 | 0.01      |
|          | 4 | train | 799  | 1   | 1   | 799  | 0.99     | 0.34    | -         |
|          |   | test  | 209  | 41  | 41  | 209  | 0.83     | 1.39e-5 | 0.01      |
|          | 5 | train | 800  | 0   | 1   | 799  | 0.99     | 0.32    | -         |
|          |   | test  | 223  | 27  | 56  | 194  | 0.83     | 1.39e-5 | 0.01      |
| 200×1000 | 1 | train | 2400 | 0   | 9   | 2391 | 0.99     | 1.99    | -         |
|          |   | test  | 607  | 93  | 146 | 554  | 0.82     | 1.42e-5 | 0.09      |
|          | 2 | train | 2400 | 0   | 11  | 2389 | 0.99     | 2.02    | -         |
|          |   | test  | 588  | 112 | 128 | 572  | 0.82     | 1.14e-5 | 0.08      |
|          | 3 | train | 2400 | 0   | 6   | 2394 | 0.99     | 1.59    | -         |
|          |   | test  | 690  | 10  | 128 | 572  | 0.90     | 1.14e-6 | 0.08      |
|          | 4 | train | 2400 | 0   | 8   | 2392 | 0.99     | 1.81    | -         |
|          |   | test  | 586  | 114 | 166 | 534  | 0.8      | 7.14e-6 | 0.09      |
|          | 5 | train | 2400 | 0   | 4   | 2396 | 0.99     | 2.04    | -         |
|          |   | test  | 688  | 12  | 149 | 2396 | 0.88     | 1.21e-5 | 0.09      |
| 500×2000 | 1 | train | 5000 | 0   | 7   | 4993 | 0.99     | 6.42    | -         |
|          |   | test  | 824  | 676 | 266 | 1234 | 0.68     | 1.70e-5 | 1.28      |
|          | 2 | train | 5000 | 0   | 12  | 4988 | 0.99     | 7.19    | -         |
|          |   | test  | 1298 | 202 | 271 | 1229 | 0.84     | 1.59e-5 | 0.36      |
|          | 3 | train | 5000 | 0   | 4   | 4996 | 0.99     | 3.48    | -         |
|          |   | test  | 1310 | 190 | 269 | 1231 | 0.84     | 8.00e-6 | 0.36      |
|          | 4 | train | 5000 | 0   | 10  | 4990 | 0.99     | 2.93    | -         |
|          |   | test  | 1372 | 128 | 284 | 1216 | 0.86     | 7.33e-6 | 0.36      |
|          | 5 | train | 5000 | 0   | 8   | 4992 | 0.99     | 2.91    | -         |
|          |   | test  | 1080 | 420 | 245 | 1255 | 0.77     | 1.06e-5 | 0.36      |

**Table 5** Classification results for the *K-Nearest Neighbor* with number of neighbors  $k = 4$ 

| Size     | # | Data  | TN   | FP | FN   | TP   | Accuracy | ML Time | CGLP Time |
|----------|---|-------|------|----|------|------|----------|---------|-----------|
| 100×300  | 1 | train | 800  | 0  | 435  | 365  | 0.72     | 0.03    | -         |
|          |   | test  | 250  | 0  | 186  | 64   | 0.62     | 0.002   | 0.01      |
|          | 2 | train | 800  | 0  | 426  | 374  | 0.73     | 0.03    | -         |
|          |   | test  | 243  | 7  | 196  | 54   | 0.59     | 0.002   | 0.01      |
|          | 3 | train | 800  | 0  | 428  | 372  | 0.73     | 0.03    | -         |
|          |   | test  | 247  | 3  | 207  | 43   | 0.58     | 0.002   | 0.01      |
|          | 4 | train | 800  | 0  | 445  | 355  | 0.72     | 0.03    | -         |
|          |   | test  | 249  | 1  | 197  | 53   | 0.60     | 0.002   | 0.01      |
|          | 5 | train | 800  | 0  | 419  | 381  | 0.73     | 0.03    | -         |
|          |   | test  | 250  | 0  | 193  | 57   | 0.61     | 0.002   | 0.01      |
| 200×1000 | 1 | train | 2400 | 0  | 966  | 1434 | 0.79     | 0.45    | -         |
|          |   | test  | 700  | 0  | 553  | 147  | 0.60     | 0.03    | 0.09      |
|          | 2 | train | 2400 | 0  | 1002 | 1398 | 0.79     | 0.46    | -         |
|          |   | test  | 699  | 1  | 531  | 169  | 0.62     | 0.03    | 0.08      |
|          | 3 | train | 2400 | 0  | 994  | 1406 | 0.79     | 0.46    | -         |
|          |   | test  | 676  | 24 | 539  | 161  | 0.59     | 0.02    | 0.08      |
|          | 4 | train | 2400 | 0  | 1014 | 1386 | 0.78     | 0.41    | -         |
|          |   | test  | 667  | 33 | 555  | 145  | 0.58     | 0.02    | 0.09      |
|          | 5 | train | 2400 | 0  | 1004 | 1396 | 0.81     | 0.42    | -         |
|          |   | test  | 699  | 1  | 543  | 157  | 0.61     | 0.02    | 0.09      |
| 500×2000 | 1 | train | 5000 | 0  | 796  | 4204 | 0.92     | 2.84    | -         |
|          |   | test  | 1471 | 29 | 1191 | 309  | 0.59     | 0.11    | 1.28      |
|          | 2 | train | 5000 | 0  | 802  | 4198 | 0.91     | 2.96    | -         |
|          |   | test  | 1448 | 52 | 1183 | 317  | 0.58     | 0.06    | 0.36      |
|          | 3 | train | 5000 | 0  | 826  | 4174 | 0.91     | 1.41    | -         |
|          |   | test  | 1496 | 4  | 1198 | 302  | 0.59     | 0.06    | 0.36      |
|          | 4 | train | 5000 | 0  | 789  | 4211 | 0.92     | 1.12    | -         |
|          |   | test  | 1388 | 12 | 1173 | 327  | 0.60     | 0.06    | 0.36      |
|          | 5 | train | 5000 | 0  | 799  | 4201 | 0.92     | 1.11    | -         |
|          |   | test  | 1407 | 93 | 1202 | 298  | 0.56     | 0.05    | 0.36      |

**Table 6** Classification results for the *Logistic Regression* with *solver=liblinear*, inverse of regularization strength  $C = 1$ , and probability  $P = 0.5$

| Size     | # | Data  | TN   | FP  | FN | TP   | Accuracy | ML Time | CGLP Time |
|----------|---|-------|------|-----|----|------|----------|---------|-----------|
| 100×300  | 1 | train | 651  | 149 | 1  | 799  | 0.90     | 0.09    | -         |
|          |   | test  | 250  | 0   | 1  | 249  | 0.99     | 0.0     | 0.01      |
|          | 2 | train | 642  | 158 | 0  | 800  | 0.90     | 0.09    | -         |
|          |   | test  | 250  | 0   | 1  | 249  | 0.99     | 1.99e-6 | 0.01      |
|          | 3 | train | 635  | 165 | 0  | 800  | 0.89     | 0.09    | -         |
|          |   | test  | 250  | 0   | 0  | 250  | 1        | 2.00e-6 | 0.01      |
|          | 4 | train | 644  | 156 | 1  | 799  | 0.90     | 0.09    | -         |
|          |   | test  | 250  | 0   | 0  | 250  | 1        | 4.00e-6 | 0.01      |
|          | 5 | train | 648  | 152 | 1  | 799  | 0.90     | 0.10    | -         |
|          |   | test  | 350  | 0   | 1  | 249  | 0.99     | 2.00e-6 | 0.01      |
| 200×1000 | 1 | train | 2212 | 188 | 0  | 2400 | 0.96     | 1.16    | -         |
|          |   | test  | 700  | 0   | 0  | 700  | 1        | 4.99e-6 | 0.09      |
|          | 2 | train | 2189 | 211 | 0  | 2400 | 0.95     | 1.22    | -         |
|          |   | test  | 700  | 0   | 2  | 698  | 0.99     | 2.85e-6 | 0.08      |
|          | 3 | train | 2186 | 214 | 0  | 2400 | 0.95     | 1.07    | -         |
|          |   | test  | 700  | 0   | 1  | 699  | 0.99     | 6.42e-6 | 0.08      |
|          | 4 | train | 2173 | 227 | 0  | 2400 | 0.95     | 0.96    | -         |
|          |   | test  | 700  | 0   | 0  | 700  | 1        | 3.57e-6 | 0.09      |
|          | 5 | train | 2195 | 205 | 0  | 2400 | 0.95     | 0.96    | -         |
|          |   | test  | 700  | 0   | 0  | 700  | 1        | 3.57e-6 | 0.09      |
| 500×2000 | 1 | train | 4942 | 58  | 0  | 5000 | 0.99     | 5.30    | -         |
|          |   | test  | 1500 | 0   | 4  | 1496 | 0.99     | 6.33e-6 | 1.28      |
|          | 2 | train | 4960 | 40  | 0  | 5000 | 0.99     | 3.62    | -         |
|          |   | test  | 1500 | 0   | 3  | 1497 | 0.99     | 7.66e-6 | 0.36      |
|          | 3 | train | 4948 | 52  | 0  | 5000 | 0.99     | 3.12    | -         |
|          |   | test  | 1500 | 0   | 6  | 1494 | 0.99     | 4.99e-6 | 0.36      |
|          | 4 | train | 4975 | 25  | 0  | 5000 | 0.99     | 3.31    | -         |
|          |   | test  | 1500 | 0   | 9  | 1491 | 0.99     | 4.33e-6 | 0.36      |
|          | 5 | train | 4924 | 76  | 0  | 5000 | 0.99     | 3.03    | -         |
|          |   | test  | 1500 | 0   | 9  | 1491 | 0.99     | 3.99e-6 | 0.36      |

**Table 7** Classification results for the *Support Vector Machine* with *kernel=linear* and regularization parameter $C = 0.4$ 

| Size     | # | Data  | TN   | FP  | FN  | TP   | Accuracy | ML Time | CGLP Time |
|----------|---|-------|------|-----|-----|------|----------|---------|-----------|
| 100×300  | 1 | train | 602  | 198 | 0   | 800  | 0.87     | 0.70    | -         |
|          |   | test  | 250  | 0   | 0   | 250  | 1        | 0.0003  | 0.01      |
|          | 2 | train | 600  | 200 | 0   | 800  | 0.87     | 0.71    | -         |
|          |   | test  | 250  | 0   | 0   | 250  | 1        | 0.0003  | 0.01      |
|          | 3 | train | 602  | 198 | 0   | 800  | 0.87     | 0.67    | -         |
|          |   | test  | 250  | 0   | 0   | 250  | 1        | 0.0003  | 0.01      |
|          | 4 | train | 600  | 200 | 0   | 800  | 0.87     | 0.66    | -         |
|          |   | test  | 250  | 0   | 0   | 250  | 1        | 0.0003  | 0.01      |
|          | 5 | train | 606  | 194 | 0   | 800  | 0.87     | 0.66    | -         |
|          |   | test  | 250  | 0   | 0   | 250  | 1        | 0.0003  | 0.01      |
| 200×1000 | 1 | train | 2346 | 54  | 0   | 2400 | 0.98     | 15.53   | -         |
|          |   | test  | 700  | 0   | 5   | 695  | 0.99     | 0.003   | 0.09      |
|          | 2 | train | 2342 | 58  | 0   | 2400 | 0.98     | 13.91   | -         |
|          |   | test  | 700  | 0   | 9   | 691  | 0.99     | 0.002   | 0.08      |
|          | 3 | train | 2317 | 83  | 0   | 2400 | 0.98     | 13.96   | -         |
|          |   | test  | 700  | 0   | 13  | 687  | 0.99     | 0.002   | 0.08      |
|          | 4 | train | 2304 | 96  | 0   | 2400 | 0.98     | 13.24   | -         |
|          |   | test  | 700  | 0   | 4   | 696  | 0.99     | 0.002   | 0.09      |
|          | 5 | train | 2317 | 83  | 0   | 2400 | 0.98     | 12.90   | -         |
|          |   | test  | 700  | 0   | 6   | 694  | 0.99     | 0.002   | 0.09      |
| 500×2000 | 1 | train | 5000 | 0   | 2   | 4998 | 0.99     | 100.63  | -         |
|          |   | test  | 1500 | 0   | 84  | 1416 | 0.97     | 0.009   | 1.28      |
|          | 2 | train | 5000 | 0   | 5   | 4995 | 0.99     | 73.96   | -         |
|          |   | test  | 1500 | 0   | 109 | 1391 | 0.96     | 0.005   | 0.36      |
|          | 3 | train | 5000 | 0   | 2   | 4998 | 0.99     | 51.58   | -         |
|          |   | test  | 1500 | 0   | 95  | 1405 | 0.96     | 0.004   | 0.36      |
|          | 4 | train | 5000 | 0   | 6   | 4994 | 0.99     | 59.99   | -         |
|          |   | test  | 1500 | 0   | 118 | 1382 | 0.96     | 0.004   | 0.36      |
|          | 5 | train | 4998 | 2   | 3   | 4997 | 0.99     | 52.90   | -         |
|          |   | test  | 1500 | 0   | 75  | 1425 | 0.97     | 0.005   | 0.36      |

**Table 8** Classification results for the *Neural Network* with *hidden layer* = 18, *activation function*= *identity*, *solver* = *sgd*, *batch size* = 100, *regularization parameter*  $\alpha = 0.01$ , *learning rate* = *adaptive*, *initial learning rate* = 0.0007, and *maximum number of iterations* = 1500

| Size     | # | Data  | TN   | FP  | FN | TP   | Accuracy | ML Time | CGLP Time |
|----------|---|-------|------|-----|----|------|----------|---------|-----------|
| 100×300  | 1 | train | 696  | 104 | 6  | 794  | 0.93     | 12.88   | -         |
|          |   | test  | 250  | 0   | 6  | 244  | 0.98     | 4.00e-6 | 0.01      |
|          | 2 | train | 712  | 88  | 2  | 798  | 0.94     | 14.36   | -         |
|          |   | test  | 250  | 0   | 5  | 245  | 0.99     | 4.00e-6 | 0.01      |
|          | 3 | train | 712  | 88  | 3  | 797  | 0.94     | 14.37   | -         |
|          |   | test  | 250  | 0   | 6  | 244  | 0.98     | 1.99e-6 | 0.01      |
|          | 4 | train | 704  | 96  | 9  | 791  | 0.93     | 13.25   | -         |
|          |   | test  | 250  | 0   | 8  | 242  | 0.98     | 2.00e-6 | 0.01      |
|          | 5 | train | 708  | 92  | 8  | 792  | 0.93     | 13.71   | -         |
|          |   | test  | 250  | 0   | 8  | 242  | 0.98     | 1.99e-6 | 0.01      |
| 200×1000 | 1 | train | 2380 | 20  | 1  | 2399 | 0.99     | 65.60   | -         |
|          |   | test  | 700  | 0   | 7  | 693  | 0.99     | 6.42e-6 | 0.09      |
|          | 2 | train | 2383 | 17  | 2  | 2398 | 0.99     | 69.05   | -         |
|          |   | test  | 700  | 0   | 16 | 684  | 0.98     | 4.28e-6 | 0.08      |
|          | 3 | train | 2376 | 24  | 1  | 2399 | 0.99     | 62.59   | -         |
|          |   | test  | 700  | 0   | 19 | 681  | 0.98     | 3.57e-6 | 0.08      |
|          | 4 | train | 2367 | 33  | 1  | 2399 | 0.99     | 65.45   | -         |
|          |   | test  | 700  | 0   | 14 | 686  | 0.99     | 6.42e-6 | 0.09      |
|          | 5 | train | 2367 | 33  | 4  | 2396 | 0.99     | 63.31   | -         |
|          |   | test  | 700  | 0   | 9  | 691  | 0.99     | 5.00e-6 | 0.09      |
| 500×2000 | 1 | train | 4994 | 6   | 1  | 4999 | 0.99     | 158.87  | -         |
|          |   | test  | 1500 | 0   | 25 | 1475 | 0.99     | 7.66e-6 | 1.28      |
|          | 2 | train | 4998 | 2   | 2  | 4998 | 0.99     | 111.11  | -         |
|          |   | test  | 1500 | 0   | 31 | 1469 | 0.98     | 8.33e-6 | 0.36      |
|          | 3 | train | 4995 | 5   | 2  | 4998 | 0.99     | 110.06  | -         |
|          |   | test  | 1500 | 0   | 24 | 1476 | 0.99     | 5.33e-6 | 0.36      |
|          | 4 | train | 4999 | 1   | 3  | 4997 | 0.99     | 86.85   | -         |
|          |   | test  | 1500 | 0   | 31 | 1469 | 0.98     | 4.66e-6 | 0.36      |
|          | 5 | train | 4987 | 13  | 2  | 4998 | 0.99     | 92.90   | -         |
|          |   | test  | 1500 | 0   | 36 | 1464 | 0.98     | 5.33e-6 | 0.36      |

**Table 9** Classification results for each layer of the B&B tree for the first instance of Table 2

| B&B Tree Depth | Train Time | True Negative | False Positive | False Negative | True Positive | Accuracy |
|----------------|------------|---------------|----------------|----------------|---------------|----------|
| 1              | 20.83      | 2             | 0              | 0              | 0             | 1.00     |
| 2              | 20.42      | 2             | 0              | 0              | 2             | 1.00     |
| 3              | 19.42      | 2             | 0              | 0              | 2             | 1.00     |
| 4              | 18.19      | 2             | 0              | 0              | 2             | 1.00     |
| 5              | 17.75      | 4             | 0              | 0              | 0             | 1.00     |
| 6              | 16.72      | 7             | 0              | 0              | 1             | 1.00     |
| 7              | 15.54      | 9             | 1              | 0              | 4             | 0.93     |
| 8              | 15.10      | 10            | 1              | 1              | 6             | 0.89     |
| 9              | 13.53      | 11            | 0              | 1              | 10            | 0.95     |
| 10             | 12.76      | 20            | 0              | 2              | 2             | 0.92     |
| 11             | 12.53      | 20            | 0              | 3              | 16            | 0.92     |
| 12             | 11.63      | 20            | 2              | 3              | 17            | 0.88     |
| 13             | 10.70      | 22            | 0              | 4              | 17            | 0.91     |
| 14             | 10.44      | 22            | 0              | 4              | 19            | 0.91     |
| 15             | 9.64       | 23            | 2              | 5              | 18            | 0.85     |
| 16             | 8.67       | 30            | 0              | 9              | 13            | 0.83     |
| 17             | 8.09       | 26            | 1              | 14             | 35            | 0.80     |
| 18             | 7.34       | 34            | 0              | 23             | 22            | 0.71     |
| 19             | 6.65       | 33            | 0              | 24             | 21            | 0.69     |
| 20             | 5.99       | 23            | 1              | 47             | 30            | 0.52     |
| 21             | 5.45       | 38            | 0              | 31             | 12            | 0.62     |
| 22             | 4.58       | 52            | 0              | 33             | 15            | 0.67     |
| 23             | 3.40       | 44            | 0              | 54             | 36            | 0.60     |
| 24             | 2.97       | 38            | 0              | 62             | 10            | 0.44     |
| 25             | 2.58       | 46            | 0              | 51             | 17            | 0.55     |
| 26             | 2.27       | 44            | 1              | 46             | 18            | 0.57     |
| 27             | 1.93       | 53            | 0              | 42             | 0             | 0.56     |
| 28             | 1.65       | 43            | 0              | 54             | 0             | 0.44     |
| 29             | 1.40       | 23            | 0              | 56             | 0             | 0.29     |
| 30             | 1.15       | 41            | 0              | 35             | 0             | 0.54     |
| 31             | 0.95       | 36            | 0              | 29             | 0             | 0.55     |
| 32             | 0.80       | 33            | 0              | 22             | 0             | 0.60     |
| 33             | 0.61       | 17            | 0              | 15             | 0             | 0.53     |
| 34             | 0.40       | 17            | 0              | 9              | 0             | 0.65     |
| 35             | 0.33       | 7             | 0              | 8              | 0             | 0.47     |
| 36             | 0.18       | 4             | 0              | 2              | 0             | 0.67     |
| 37             | 0.10       | 4             | 0              | 1              | 0             | 0.80     |
| 38             | 0.04       | 1             | 0              | 0              | 0             | 1.00     |

**Table 10** Classification results for each layer of the B&B tree for the first instance of Table 3

| B&B Tree Depth | Train Time | True Negative | False Positive | False Negative | True Positive | Accuracy |
|----------------|------------|---------------|----------------|----------------|---------------|----------|
| 1              | 6.0372     | 2             | 0              | 0              | 0             | 1.00     |
| 2              | 5.5961     | 3             | 0              | 0              | 1             | 1.00     |
| 3              | 5.1293     | 3             | 0              | 1              | 2             | 0.83     |
| 4              | 4.9456     | 4             | 1              | 0              | 3             | 0.88     |
| 5              | 4.7717     | 5             | 0              | 1              | 2             | 0.88     |
| 6              | 4.5564     | 7             | 0              | 1              | 1             | 0.89     |
| 7              | 4.0524     | 6             | 1              | 2              | 4             | 0.77     |
| 8              | 3.8808     | 7             | 0              | 4              | 3             | 0.71     |
| 9              | 3.7526     | 10            | 0              | 3              | 7             | 0.85     |
| 10             | 3.3934     | 12            | 2              | 5              | 6             | 0.72     |
| 11             | 2.9123     | 14            | 0              | 8              | 8             | 0.73     |
| 12             | 2.6759     | 17            | 1              | 12             | 6             | 0.64     |
| 13             | 2.4469     | 12            | 2              | 13             | 10            | 0.59     |
| 14             | 2.2926     | 19            | 0              | 13             | 4             | 0.64     |
| 15             | 2.0172     | 23            | 0              | 22             | 13            | 0.62     |
| 16             | 1.8169     | 31            | 0              | 23             | 21            | 0.69     |
| 17             | 1.6957     | 29            | 1              | 36             | 24            | 0.59     |
| 18             | 1.6244     | 32            | 0              | 41             | 20            | 0.56     |
| 19             | 1.4567     | 35            | 0              | 44             | 12            | 0.52     |
| 20             | 1.2023     | 31            | 0              | 53             | 20            | 0.48     |
| 21             | 0.7969     | 26            | 0              | 40             | 14            | 0.50     |
| 22             | 0.6471     | 24            | 0              | 38             | 10            | 0.47     |
| 23             | 0.5648     | 28            | 0              | 31             | 7             | 0.53     |
| 24             | 0.4168     | 26            | 0              | 26             | 8             | 0.57     |
| 25             | 0.3536     | 23            | 0              | 22             | 4             | 0.55     |
| 26             | 0.2855     | 20            | 0              | 15             | 0             | 0.57     |
| 27             | 0.1453     | 17            | 0              | 8              | 0             | 0.68     |
| 28             | 0.1172     | 14            | 0              | 5              | 0             | 0.74     |
| 29             | 0.0871     | 7             | 0              | 2              | 0             | 0.78     |
| 30             | 0.0694     | 5             | 0              | 1              | 0             | 0.83     |

## Appendix B: Sensitivity Analysis

As noted in Section (4.1), one set of class-1 vectors in the training data set is generated based on the result of Corollary 5(i), which requires non-redundancy of constraints of  $\mathcal{C}$ . Since checking redundancy of constraints in practical applications is time-consuming, we perform sensitivity analysis on the redundancy ratio of constraints to evaluate its impact on classification results. For this analysis, we study different redundancy ratios as in Figure 22 of Kalantari and Zhang (2022) by creating redundant vectors through a conic combination of vectors of  $\mathcal{C}$  and adding them to the cone. We conduct these experiments on the first instance of each size category. These results for the top three classifiers LR, SVM and NN are summarized in Figure 3. As shown in these figures, the classification accuracy for training data declines slightly as the redundancy ratio increases. This decline is due to the fact that the training data generated through Corollary 5(i) are not guaranteed to be a class-1 vector when the base constraint is redundant. These vectors, however, are labeled as class-1 in the training set, leading to a potential misclassification. Nevertheless, it is inferred from these experiments that the impact of this source of misclassification is reduced due to the balance in the remaining sets of training data, which results in maintaining high accuracy of the test set across different redundancy ratios and problem sizes.

Another deciding factor in creating training data set is  $\epsilon$ , which determines the proximity of class-0 and class-1 vectors to the boundary of the polar cone. To investigate the marginal impact of different values of  $\epsilon$  on the classification performance, we next conduct sensitivity analysis on the first instance of each problem size category and each classification method. These results for the top three classifiers LR, SVM and NN are summarized in Figure 4. As observed in these figures, the common trend across all classification methods and problem sizes is that, increasing the  $\epsilon$  value leads to a higher training accuracy and a lower test accuracy. This trend is expected as the larger  $\epsilon$  values broaden the spatial gap between class-0 and class-1 training data, which enables the classifier to improve training accuracy at the expense of reducing test accuracy.

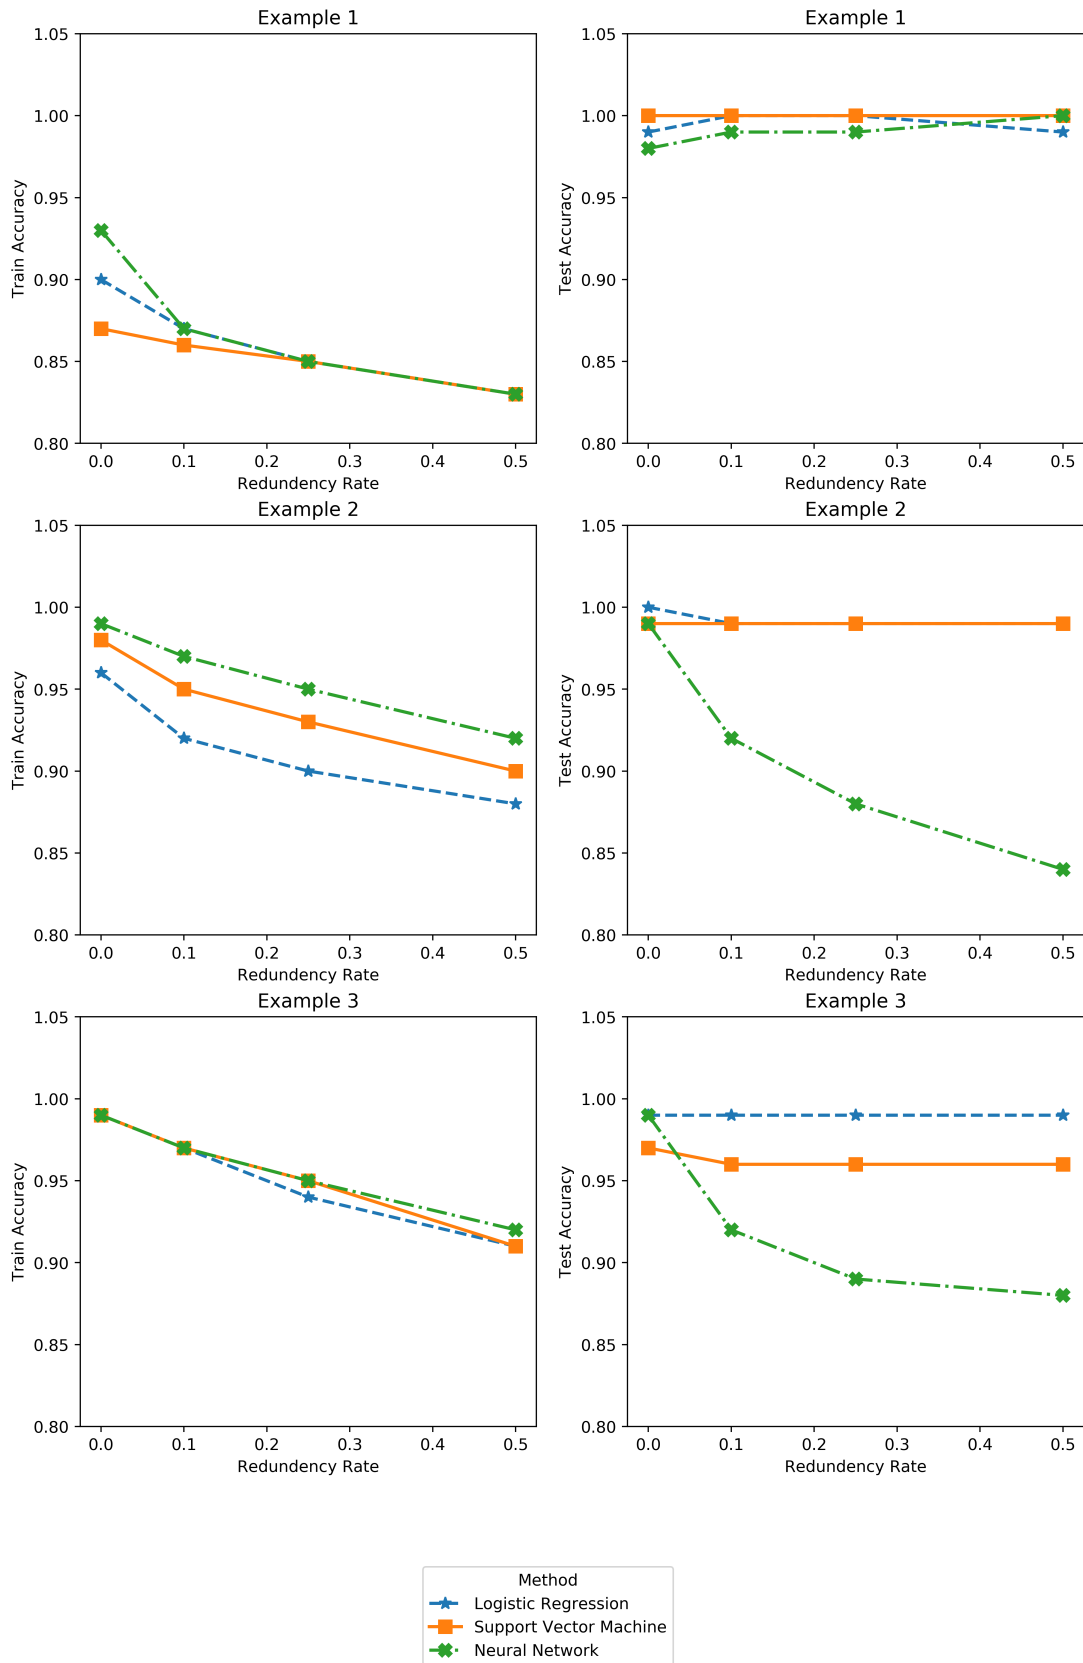

Figure 3 Sensitivity analysis results for redundancy ratio

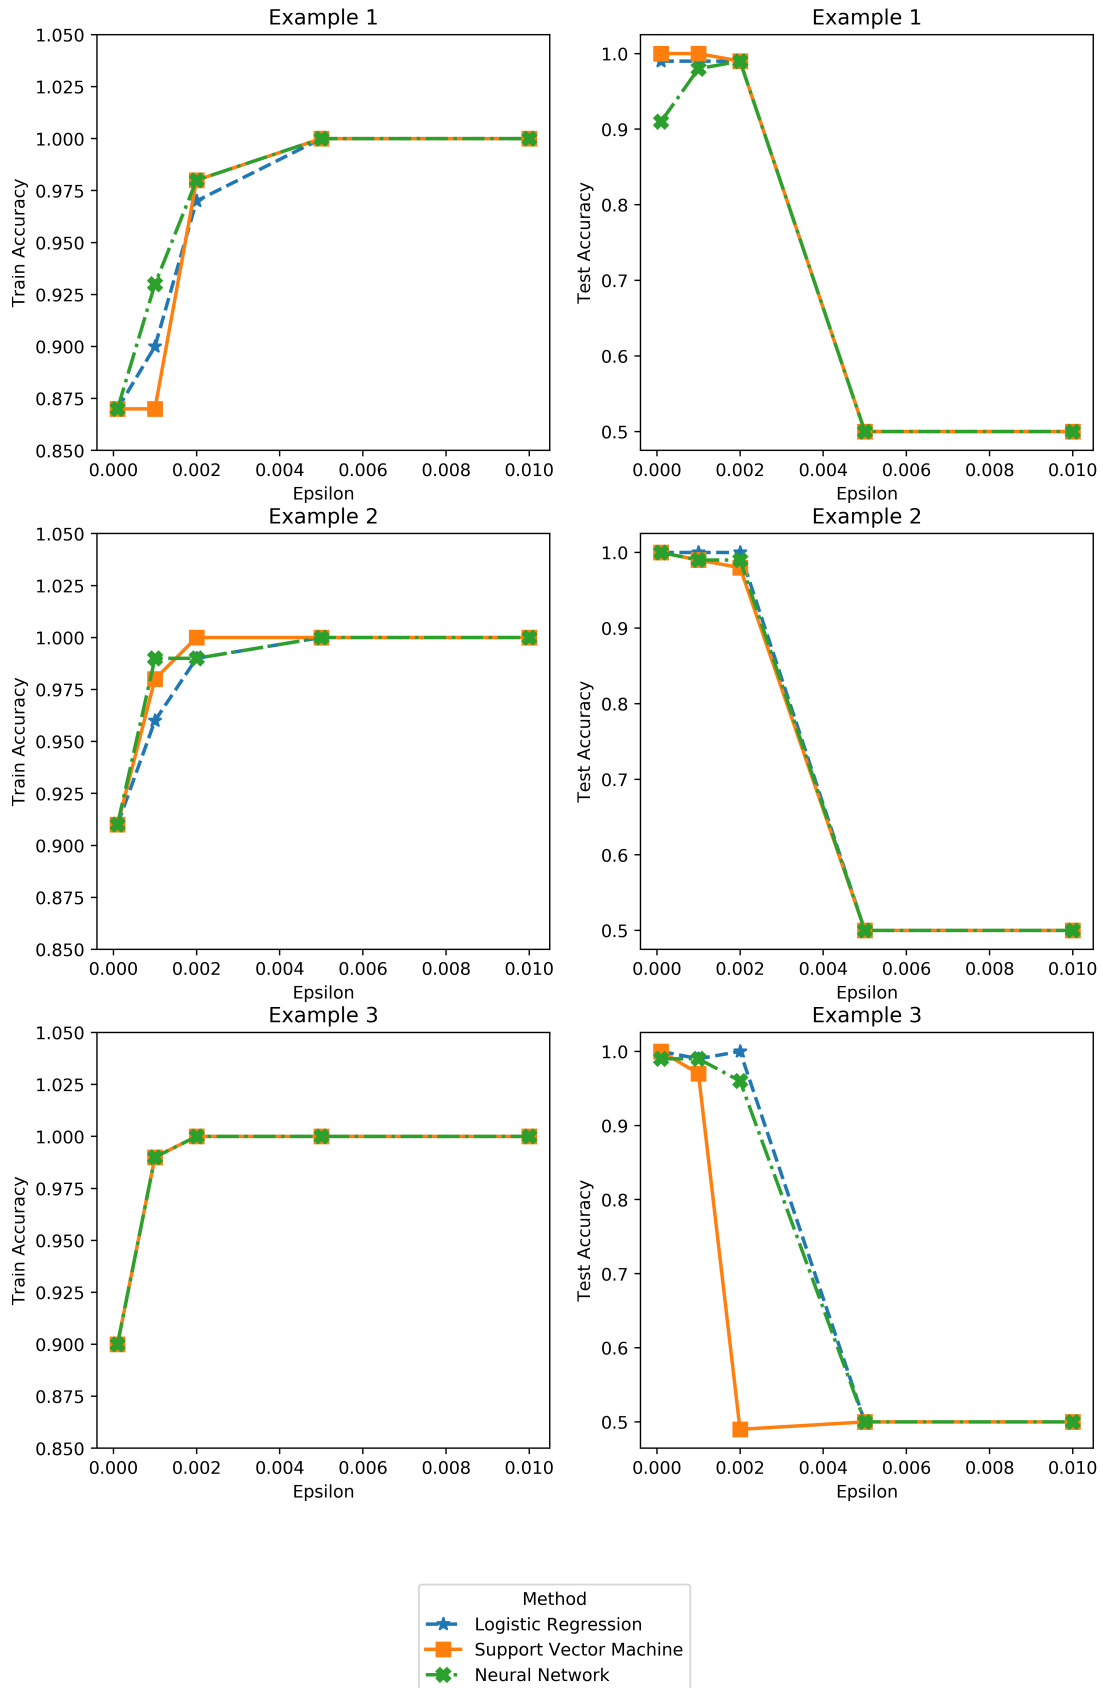

Figure 4 Sensitivity analysis results for values of  $\epsilon$

As noted in Section 4.1, we have used  $4(m+n)$  data points in our training set for the CHM problem. In Figures 5 and 6, we show the relationship between the size of the training set and the training time and accuracy of the classification for the LR method. We conduct these experiments on one instance of each size category ( $100 \times 300$ ), ( $200 \times 1000$ ), and ( $500 \times 2000$ ). We consider four different sizes for the training set as multiples of the total number of constraints in the cone  $\mathcal{C}$ , namely  $2(m+n)$ ,  $4(m+n)$ ,  $6(m+n)$ , and  $8(m+n)$ . All the other parameters are set similarly to those used in the experiments reported in Section 4.1. As observed in these figures, increasing the size of the training set leads to increasing the accuracy at the price of increasing the training time. Based on these results, the choice of  $4(m+n)$  provides a reasonable trade-off between the training time and accuracy.

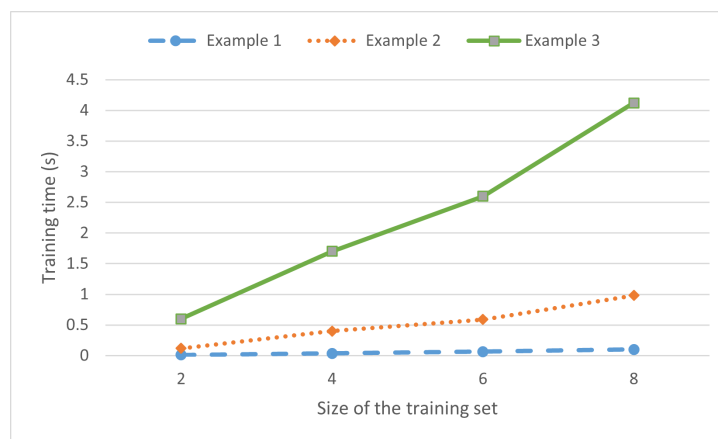

Figure 5 The impact of the size of the training set on the training time for the LR method in CHM problem.

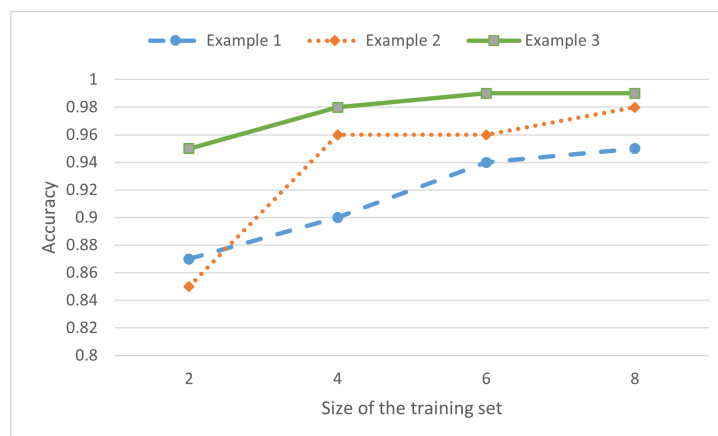

Figure 6 The impact of the size of the training set on the training accuracy for the LR method in CHM problem.

For the next sensitivity analysis, we consider the test accuracy for the LR method applied to the CHM problem for different categories of test instances based on their distance from the boundary of the polar cone. To this end, we use similar settings to those mentioned in Section 4.1 to train a LR classifier for one

**Table 11** Classification results for the *Logistic Regression* approach for test instances with different distance values from the boundary of the polar cone

| Size     | $\epsilon$ | TN   | FP | FN  | TP   | Accuracy |
|----------|------------|------|----|-----|------|----------|
| 100×300  | 0.0005     | 774  | 26 | 190 | 610  | 0.87     |
|          | 0.001      | 793  | 7  | 149 | 651  | 0.91     |
|          | 0.0015     | 800  | 0  | 94  | 706  | 0.95     |
|          | 0.002      | 800  | 0  | 61  | 739  | 0.98     |
|          | 0.0025     | 800  | 0  | 15  | 785  | 0.99     |
| 200×1000 | 0.0005     | 2359 | 41 | 394 | 2006 | 0.91     |
|          | 0.001      | 2385 | 15 | 191 | 2209 | 0.94     |
|          | 0.0015     | 2400 | 0  | 117 | 2283 | 0.98     |
|          | 0.002      | 2400 | 0  | 46  | 2354 | 0.99     |
|          | 0.0025     | 2400 | 0  | 0   | 2400 | 1        |
| 500×2000 | 0.0005     | 5000 | 0  | 855 | 4145 | 0.92     |
|          | 0.001      | 5000 | 0  | 504 | 4496 | 0.96     |
|          | 0.0015     | 5000 | 0  | 57  | 4943 | 0.99     |
|          | 0.002      | 5000 | 0  | 0   | 5000 | 1        |
|          | 0.0025     | 5000 | 0  | 0   | 5000 | 1        |

instance of each size category. Then, we use the resulting classifier to predict the class of data points in the test sets that are generated based on a similar method used to generate the training set where the proximity of the generated vector is determined by the  $\epsilon$  value in Corollary 1 for class-0 and Corollary 5(i) for class-1. As noted in Section 4.1, the vectors produced in this process are normalized to have a uniform scaling for all data points in class-1 and class-0. We consider five categories for  $\epsilon \in \{0.0005, 0.001, 0.0015, 0.002, 0.0025\}$  to represent different distance values. For each distance category of the problem size ( $100 \times 300$ ), ( $200 \times 1000$ ), and ( $500 \times 2000$ ), we consider the test set size 1600, 4800, and 10000, respectively. The accuracy results, including the elements of the confusion matrix, are given in Table 11 and Figure 7. As observed from these plots, the test accuracy increases with the distance of the data points from the boundary of the polar cone.

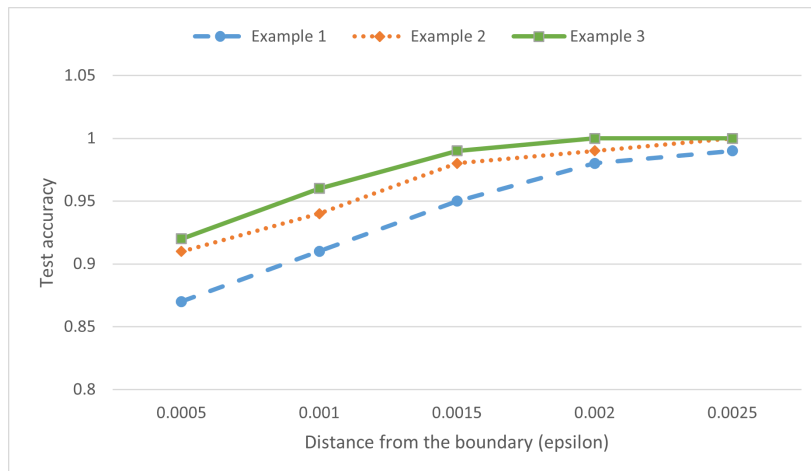

Figure 7 The test accuracy for different distance categories for the LR method in CHM problem.

### Appendix C: Consistency Cuts and Strong Branching

As mentioned in Section 3, the goal of using consistency cuts is to achieve (partial) LP-consistency. An alternative approach to ensure partial-LP consistency for rank  $r$  at any node of the B&B tree associated with the partial assignment  $\alpha_I = \mathbf{v}_I$  such that  $\mathcal{S}_{LP} \cap \{\alpha \in \mathbb{R}^n : \alpha_I = \mathbf{v}_I\} \neq \emptyset$  is to check whether there exists  $J \subseteq N \setminus I$  with  $|J| = r$  such that the LP relaxations described by  $\mathcal{S}_{LP} \cap \{\alpha \in \mathbb{R}^n : \alpha_{I \cup J} = \mathbf{v}_{I \cup J}\}$  is infeasible for every 0–1 value assignment  $\alpha_J = \mathbf{v}_J$ . In this case, the node will be pruned. This approach is similar to the so-called *strong branching* technique frequently used in B&B by solvers. It is shown in Davarnia et al. (2022) that the consistency cut framework has a computational advantage compared to the strong branching method as outlined next. In particular, Proposition 5.5 in Davarnia et al. (2022) shows that applying the CGLP of Proposition 6 for a certain rank  $r$  can achieve LP-consistency of ranks higher than  $r$ . In other words, the CGLP obtained from the intersection of the multilinear constraints produced by the multiplication with unfixed variables can lead to separating inconsistent faces that remain feasible if we consider the disjunctive model for each unfixed variable individually (which is equivalent to the outcome of the strong branching); see Example 5.3 in Davarnia et al. (2022) for an illustration. This property can lead to a significant reduction in the B&B tree size when using the CGLP approach compared to the strong branching approach. As a numerical evidence for the above property, we present in Tables 12 and 13 computational experiments on the instances of Tables 2 and 3, respectively, which show that the outcome of the consistency approach outperforms that of the strong branching method in terms of both the tree size and the solution time.

### Appendix D: Machine Learning Approach for Higher Consistency Ranks

In this section, we present computational results to evaluate the performance of the ML approach in approximating the CGLP corresponding to partial LP-consistency of higher ranks compared to that of rank one presented in Table 2 of Section 4.2. To obtain the CGLP for rank  $r$ , following Algorithm 1, we need to multiply each constraint of the original model with all  $2^r$  product combinations of every tuple of size  $r$  of unfixed variables at each node of the B&B tree. As a result, increasing  $r$  leads to larger problem sizes in terms of both the number of variables and constraints in the CGLP that is solved at each node of the B&B

**Table 12 Comparison of the consistency cuts and the strong branching approach for multi-knapsack problems**

| $n$ | $m$ | # | B&B     |           | CGLP         |              |                 |              | Strong Branching |              |          |              |
|-----|-----|---|---------|-----------|--------------|--------------|-----------------|--------------|------------------|--------------|----------|--------------|
|     |     |   | nodes   | time      | nodes        | $\Delta$ (%) | time            | $\Delta$ (%) | nodes            | $\Delta$ (%) | time     | $\Delta$ (%) |
| 40  | 50  | 1 | 34473   | 3142.60   | <b>2383</b>  | 93           | <b>1103.69</b>  | 64           | 12755            | 63           | 1351.06  | 57           |
|     |     | 2 | 82417   | 7496.14   | <b>5625</b>  | 93           | <b>3548.07</b>  | 52           | 26373            | 68           | 4122.8   | 45           |
|     |     | 3 | 78965   | 7167.15   | <b>5225</b>  | 93           | <b>2197.50</b>  | 69           | 25269            | 68           | 2436.78  | 66           |
|     |     | 4 | 124327  | 11377.96  | <b>5863</b>  | 95           | <b>2682.24</b>  | 76           | 36055            | 71           | 3754.41  | 67           |
|     |     | 5 | 126209  | 11700.49  | <b>6197</b>  | 95           | <b>3120.76</b>  | 73           | 37863            | 70           | 3393.05  | 71           |
| 45  | 55  | 1 | 1050459 | 119705.93 | <b>63677</b> | 93           | <b>31929.71</b> | 73           | 189083           | 82           | 49079.07 | 59           |
|     |     | 2 | 57621   | 5449.79   | <b>3519</b>  | 93           | <b>2116.51</b>  | 61           | 17863            | 69           | 2288.58  | 58           |
|     |     | 3 | 94281   | 8424.51   | <b>4693</b>  | 95           | <b>2965.73</b>  | 64           | 26399            | 72           | 3875.14  | 54           |
|     |     | 4 | 450175  | 44544.77  | <b>22645</b> | 94           | <b>13808.84</b> | 69           | 112543           | 75           | 18708.34 | 58           |
|     |     | 5 | 630449  | 65030.67  | <b>44875</b> | 92           | <b>26270.06</b> | 59           | 176525           | 71           | 27962.9  | 57           |
| 45  | 60  | 1 | 989029  | 116212.23 | <b>54721</b> | 94           | <b>35255.78</b> | 69           | 326379           | 67           | 48809.14 | 58           |
|     |     | 2 | 257217  | 25121.01  | <b>17321</b> | 93           | <b>9948.30</b>  | 60           | 56587            | 78           | 11304.45 | 55           |
|     |     | 3 | 249869  | 23936.52  | <b>14063</b> | 94           | <b>7917.20</b>  | 66           | 59969            | 76           | 9335.40  | 61           |
|     |     | 4 | -       | >86400    | <b>56847</b> | -            | <b>31665.33</b> | >63          | 239325           | -            | 38016.84 | >56          |
|     |     | 5 | 320967  | 31300.88  | <b>17925</b> | 94           | <b>12102.74</b> | 61           | 80241            | 75           | 13772.13 | 56           |
| 50  | 60  | 1 | 329277  | 31947.91  | <b>12393</b> | 96           | <b>11852.70</b> | 62           | 8945             | 72           | 14696.62 | 54           |
|     |     | 2 | 531833  | 54939.26  | <b>22885</b> | 95           | <b>20104.97</b> | 63           | 106367           | 80           | 21975.36 | 60           |
|     |     | 3 | -       | >86400    | <b>93375</b> | -            | <b>70096.13</b> | >18          | 103369           | -            | 76896.19 | >11          |
|     |     | 4 | 174357  | 16540.17  | <b>8533</b>  | 95           | <b>7478.74</b>  | 54           | 41845            | 76           | 9262.45  | 44           |
|     |     | 5 | -       | >86400    | <b>53671</b> | -            | <b>44288.28</b> | >48          | 43507            | -            | 50112.72 | >42          |

**Table 13 Comparison of the consistency cuts and the strong branching approach for MIPLIB problems**

| Class   | $n$ | $m$ | B&B    |         | CGLP          |              |                |              | Strong Branching |              |                |              |
|---------|-----|-----|--------|---------|---------------|--------------|----------------|--------------|------------------|--------------|----------------|--------------|
|         |     |     | nodes  | time    | nodes         | $\Delta$ (%) | time           | $\Delta$ (%) | nodes            | $\Delta$ (%) | time           | $\Delta$ (%) |
| p0033   | 33  | 15  | 32117  | 2961.55 | <b>385</b>    | 98           | <b>283.14</b>  | 90           | 5139             | 84           | 887.3          | 70           |
| pipex   | 41  | 48  | 1057   | 1933.48 | <b>623</b>    | 41           | <b>1484.10</b> | 23           | 707              | 33           | 1527.07        | 19           |
| sentoy  | 60  | 30  | 703    | 391.12  | <b>271</b>    | 63           | <b>187.27</b>  | 53           | 365              | 48           | 218.96         | 44           |
| stein27 | 27  | 118 | 6099   | 2474.1  | <b>4823</b>   | 22           | 2115.07        | 15           | 4819             | 21           | <b>1927.38</b> | 22           |
| enigma  | 100 | 42  | 98545  | 7413.51 | <b>21679</b>  | 78           | <b>2669.5</b>  | 64           | 55185            | 44           | 3632.37        | 51           |
| lseu    | 89  | 28  | 219597 | 4138.8  | <b>186963</b> | 15           | <b>3724.2</b>  | 10           | 193245           | 12           | 3806.96        | 8            |

tree, which leads to an extensive computational burden. For example, for most of the instances studied in Table 2, we ran into memory errors when using the CGLP of rank  $r = 2$ . As an example, when there are 10 unfixed variables remaining at a layer of the B&B tree, to obtain the CGLP for rank  $r = 1$ , the number of

constraints in the linearized system will be multiplied by 20, whereas for CGLP of rank  $r = 2$ , this size will be multiplied by 180. Nonetheless, to provide some insight on the performance of the ML approach for ranks higher than one, we present in Table 14 computational experiments that compare the outcome of using ML for rank  $r = 1$  and  $r = 2$  for instances of Section 4.2.

For these experiments, due to extensive computational burden of applying the consistency framework for higher ranks at each node of the B&B tree, as discussed above, we have used the common  $(K, L)$  approach described as follows. The goal is to reduce the implementation time by (i) applying the CGLP (or its alternative ML approach in this case) in certain layers of the B&B tree only, and (ii) choosing a subset of unfixed variables to multiply with the constraints. We represent the layer candidates for applying the CGLP by  $K$ , and the variable indices used for multiplication by  $L$ . It is intuitive to pick top layers of the B&B tree to be included in  $K$ , and choose variable indices at the bottom layers of the tree to be included in  $L$ ; see Davarnia et al. (2022) for further illustration of this approach. For the experiments presented in Tables 14 and 15, we have chosen  $K = 10$  and  $L = 10$  for both ML approaches targeting partial LP-consistency of rank one and two to provide a fair comparison in a controlled setting. The columns in these tables are defined similarly to those of Tables 2 and 3 with a difference that the subcolumns under “LR,  $r = 1$ ” and “LR,  $r = 2$ ” include the B&B tree size and solution time for applying the logistic regression approach for partial LP-consistency of rank one and two using the  $(K, L)$  approach. The implementation and algorithmic settings are similar to those used in Section 4.2. All instances in these experiments have been solved to optimality for both approaches. As observed in Tables 14 and 15, the logistic regression method when used to approximate the outcome of the CGLP of rank  $r = 2$  outperforms that used for rank  $r = 1$  in both B&B tree size and total solution time in most of the instances.

**Table 14 Comparison of the ML approach for different consistency ranks for multi-knapsack problems**

| $n$ | $m$ | # | B&B     |           | LR, $r = 1$ , and $K = L = 10$ |              |           |              | LR, $r = 2$ , and $K = L = 10$ |              |                 |              |
|-----|-----|---|---------|-----------|--------------------------------|--------------|-----------|--------------|--------------------------------|--------------|-----------------|--------------|
|     |     |   | nodes   | time      | nodes                          | $\Delta$ (%) | time      | $\Delta$ (%) | nodes                          | $\Delta$ (%) | time            | $\Delta$ (%) |
| 40  | 50  | 1 | 34473   | 3142.60   | 26651                          | 23           | 2453.62   | 22           | <b>22967</b>                   | 34           | <b>2186.80</b>  | 31           |
|     |     | 2 | 82417   | 7496.14   | 76177                          | 8            | 7051.42   | 6            | <b>54347</b>                   | 35           | <b>5116.49</b>  | 32           |
|     |     | 3 | 78965   | 7167.15   | 78717                          | 0            | 7258.27   | -1           | <b>69523</b>                   | 12           | <b>6524.29</b>  | 9            |
|     |     | 4 | 124327  | 11377.96  | 117233                         | 6            | 10832.11  | 5            | <b>101065</b>                  | 19           | <b>9421.17</b>  | 18           |
|     |     | 5 | 126209  | 11700.49  | 98121                          | 24           | 9072.97   | 23           | <b>61539</b>                   | 52           | <b>5772.71</b>  | 51           |
| 45  | 55  | 1 | 1050459 | 119705.93 | 1035775                        | 2            | 116557.46 | 3            | <b>190993</b>                  | 81           | <b>17972.34</b> | 85           |
|     |     | 2 | 57621   | 5449.79   | 53507                          | 8            | 4265.75   | 22           | <b>32073</b>                   | 45           | <b>2971.28</b>  | 46           |
|     |     | 3 | 94281   | 8424.51   | 62925                          | 34           | 5876.83   | 30           | <b>12029</b>                   | 87           | <b>1149.06</b>  | 86           |
|     |     | 4 | 450175  | 44544.77  | 398539                         | 12           | 39966.08  | 11           | <b>286923</b>                  | 37           | <b>27952.67</b> | 38           |
|     |     | 5 | 630449  | 65030.67  | 630449                         | 0            | 65690.10  | -2           | <b>263239</b>                  | 58           | <b>25554.13</b> | 61           |
| 45  | 60  | 1 | 989029  | 116212.23 | 951755                         | 4            | 104927.14 | 10           | <b>779599</b>                  | 22           | <b>85763.15</b> | 27           |
|     |     | 2 | 257217  | 25121.01  | 255045                         | 1            | 23902.25  | 5            | <b>207051</b>                  | 20           | <b>19344.72</b> | 24           |
|     |     | 3 | 249869  | 23936.52  | 233177                         | 7            | 21761.88  | 10           | <b>63619</b>                   | 74           | <b>5980.96</b>  | 76           |
|     |     | 4 | -       | >86400    | 823355                         | -            | 90986.38  | -            | <b>641949</b>                  | -            | <b>77075.34</b> | -            |
|     |     | 5 | 320967  | 31300.88  | 320363                         | 0            | 31782.85  | -2           | <b>182909</b>                  | 45           | <b>16944.11</b> | 46           |
| 50  | 60  | 1 | 329277  | 31947.91  | 270375                         | 18           | 25977.05  | 20           | <b>166139</b>                  | 50           | <b>15501.51</b> | 52           |
|     |     | 2 | 531833  | 54939.26  | 516531                         | 3            | 52111.54  | 6            | <b>93973</b>                   | 82           | <b>8679.84</b>  | 85           |
|     |     | 3 | -       | >86400    | -                              | -            | -         | -            | -                              | -            | -               | -            |
|     |     | 4 | 174357  | 16540.17  | 171407                         | 2            | 15523.94  | 7            | <b>151981</b>                  | 13           | <b>13994.98</b> | 16           |
|     |     | 5 | -       | >86400    | -                              | -            | -         | -            | -                              | -            | -               | -            |

**Table 15 Comparison of the ML approach for different consistency ranks for MIPLIB problems**

| Class   | $n$ | $m$ | B&B    |         | LR, $r = 1$ , and $K = L = 10$ |              |                |              | LR, $r = 2$ , and $K = L = 10$ |              |                |              |
|---------|-----|-----|--------|---------|--------------------------------|--------------|----------------|--------------|--------------------------------|--------------|----------------|--------------|
|         |     |     | nodes  | time    | nodes                          | $\Delta$ (%) | time           | $\Delta$ (%) | nodes                          | $\Delta$ (%) | time           | $\Delta$ (%) |
| p0033   | 33  | 15  | 32117  | 2961.55 | 22161                          | 31           | 2191.14        | 26           | <b>13811</b>                   | 57           | <b>1658.16</b> | 44           |
| pipex   | 41  | 48  | 1057   | 1933.48 | 983                            | 7            | 1875.01        | 3            | <b>865</b>                     | 18           | <b>1643.5</b>  | 15           |
| sentoy  | 60  | 30  | 703    | 391.12  | 611                            | 13           | 336.16         | 14           | <b>505</b>                     | 28           | <b>273.7</b>   | 30           |
| stein27 | 27  | 118 | 6099   | 2474.1  | 5001                           | 18           | <b>2152.37</b> | 13           | <b>4879</b>                    | 20           | 2251.34        | 9            |
| enigma  | 100 | 42  | 98545  | 7413.51 | 70951                          | 28           | 5782.14        | 22           | <b>57155</b>                   | 42           | <b>4077.15</b> | 45           |
| lseu    | 89  | 28  | 219597 | 4138.8  | 217401                         | 1            | 4183.11        | -1           | <b>199833</b>                  | 9            | <b>3641.44</b> | 12           |
